# Supplementary material
Source: MDPI journal article supplement (https://www.mdpi.com/2673-3897/4/3/18)
Supplement: s1 [file s1]

**Table S1.** Spearman's rank correlation between BMI or age and hormonal parameters of ovarian reserve in control women stratified by the presence of ovulatory disorders (OD).

|                | <b>Women with OD<br/>(n = 22)</b> | <b>Women<br/>without OD<br/>(n = 74)</b> |
|----------------|-----------------------------------|------------------------------------------|
| <b>Age/AMH</b> | $r = -0.37$<br>$p = 0.09$         | $r = -0.18$<br>$p = 0.13$                |
| <b>Age/FSH</b> | $r = 0.18$<br>$p = 0.42$          | $r = 0.19$<br>$p = 0.11$                 |
| <b>Age/ LH</b> | $r = 0.28$<br>$p = 0.21$          | $r = 0.096$<br>$p = 0.41$                |
| <b>Age/E2</b>  | $r = 0.37$<br>$p = 0.084$         | $r = 0.16$<br>$p = 0.17$                 |
| <b>BMI/AMH</b> | $r = -0.15$<br>$p = 0.49$         | $r = -0.03$<br>$p = 0.80$                |
| <b>BMI/FSH</b> | $r = 0.27$<br>$p = 0.22$          | $r = 0.14$<br>$p = 0.24$                 |
| <b>BMI/LH</b>  | $r = -0.07$<br>$p = 0.76$         | $r = -0.03$<br>$p = 0.79$                |
| <b>BMI/E2</b>  | $r = 0.04$<br>$p = 0.84$          | $r = -0.18$<br>$p = 0.13$                |
